# Supplementary material
Source: publisher site journal article supplement (https://www.dovepress.com/article/541879)
Supplement: Supplementary file 1 [file 541879%20Revised%20Supplementary%20Materials.pdf]

## Supplementary materials

**Figure S1. ROC Curves for Other Inflammatory Markers.**

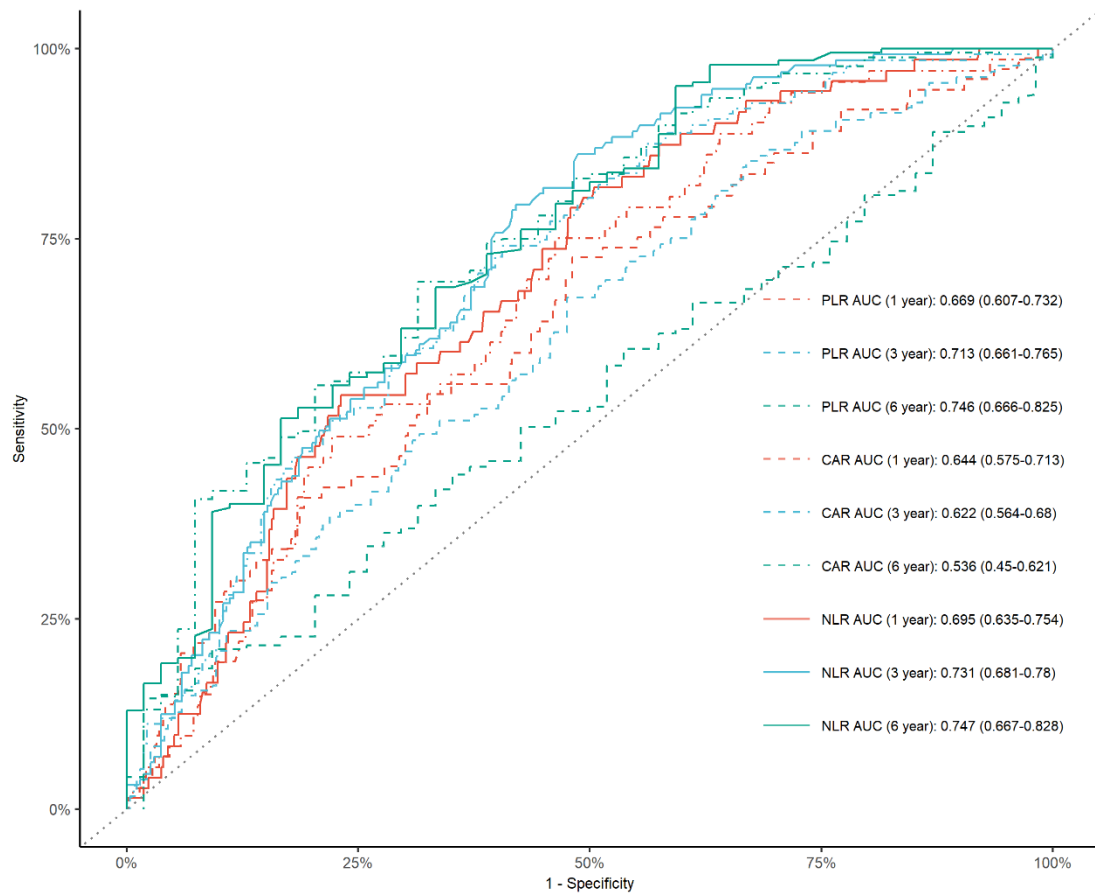

Abbreviations: The AUCs (95% CI) of PLR were 0.669 (0.607-0.732) for 1 year, 0.713 (0.661-0.765) for 3-year and 0.746 (0.666-0.825) for 6-year mortality. The AUCs (95% CI) of CAR were 0.644 (0.575-0.713) for 1 year, 0.622 (0.564-0.680) for 3-year and 0.536 (0.450-0.621) for 6-year mortality. The AUCs (95% CI) of NLR were 0.695 (0.635-0.754) for 1 year, 0.731 (0.681-0.780) for 3-year and 0.747 (0.667-0.828) for 6-year mortality. AUC, area under the curve; CAR, C-reactive protein-albumin ratio; CI, confidence interval; NLR, neutrophil-lymphocyte ratio; PLR, platelet-lymphocyte ratio; ROC, receiver operating characteristic curve. Delong test for NLR:  $P = 0.008$ , PLR:  $P = 0.074$ , CAR  $P = 0.005$ .

**Figure S2. Subgroup Analysis for the Association between the Cumulative Inflammatory Index and Mortality in Stroke-Associated Pneumonia.**

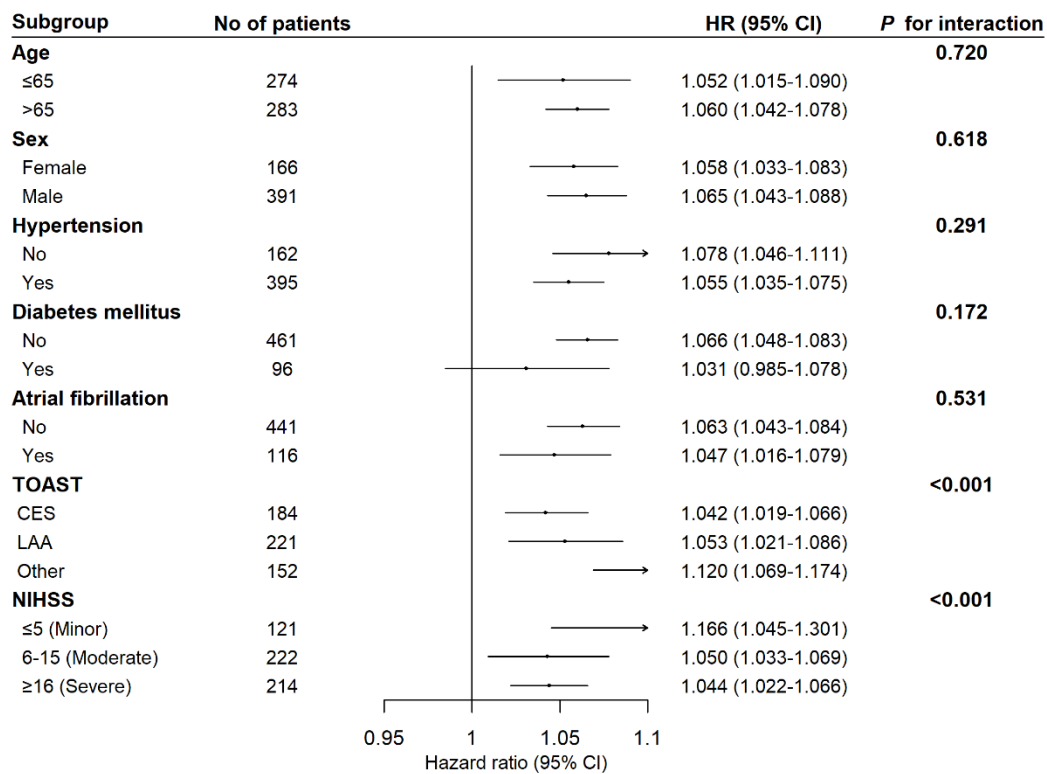

Abbreviations: We observed no significant interactions were detected between subgroup factors and IIC in relation to prolonged mortality among SAP patients, except for atrial fibrillation and stroke severity. CES, cardio-embolic stroke; CI, confidence interval; HR, hazard ratio; LAA, large artery atherosclerosis; NIHSS, National Institute of Health Stroke Scale; TOAST, Trial of ORG 10172 in Acute Stroke Treatment.

**Table S1. Definition of the Pneumonia Severity Index score.**

| <b>Characteristics</b>                                      | <b>Points</b> |
|-------------------------------------------------------------|---------------|
| Demographic factor                                          |               |
| Age                                                         |               |
| Men                                                         | Age (year)    |
| Women                                                       | Age (year)-10 |
| Nursing home resident                                       | +10           |
| Coexisting illnesses                                        |               |
| Neoplastic disease                                          | +30           |
| Liver disease                                               | +20           |
| Congestive heart failure                                    | +10           |
| Cerebrovascular disease                                     | +10           |
| Renal disease                                               | +10           |
| Physical-examination findings                               |               |
| Altered mental status                                       | +20           |
| Respiratory rate $\geq 30$ /min                             | +20           |
| Systolic blood pressure $< 90$ mmHg                         | +20           |
| Temperature $< 35^\circ\text{C}$ or $\geq 40^\circ\text{C}$ | +15           |
| Pulse $\geq 125$ /min                                       | +10           |
| Laboratory and radiographic findings                        |               |
| Arterial pH $< 7.35$                                        | +30           |
| Blood urea nitrogen $\geq 11$ mmol/L                        | +20           |
| Sodium $< 130$ mmol/L                                       | +20           |
| Glucose $\geq 14$ mmol/L                                    | +10           |
| Hematocrit $< 30\%$                                         | +10           |
| Partial pressure of arterial oxygen $< 60$ mmHg             | +10           |
| Pleural effusion                                            | +10           |
| Total Points                                                |               |

**Table S2. Baseline Characteristics According to the Cumulative Inflammatory Index Tertiles.**

| <b>Characteristics</b>          | <b>Tertile 1<br/>(n = 187)</b> | <b>Tertile 2<br/>(n = 184)</b> | <b>Tertile 3<br/>(n = 186)</b> | <b>P value</b> |
|---------------------------------|--------------------------------|--------------------------------|--------------------------------|----------------|
| Age, years                      | 65.0 [56.5, 71.0]              | 65.0 [57.0, 73.2]              | 68.0 [59.2, 75.0]              | 0.026          |
| Male, n (%)                     | 124 (66.3)                     | 129 (70.1)                     | 138 (74.2)                     | 0.250          |
| BMI, kg/m <sup>2</sup>          | 24.8 (3.4)                     | 24.2 (3.4)                     | 24.5 (3.4)                     | 0.251          |
| Vital signs                     |                                |                                |                                |                |
| Systolic blood pressure, mmHg   | 140.7 (20.4)                   | 138.6 (20.4)                   | 137.3 (20.7)                   | 0.284          |
| Temperature, °C                 | 37.0 [36.8, 37.8]              | 37.8 [37.0, 38.3]              | 38.0 [37.4, 38.6]              | <0.001         |
| Pulse, n/min                    | 87.0 [79.5, 99.0]              | 92.0 [80.0, 112.2]             | 104.0 [89.0, 119.8]            | <0.001         |
| Smoking, n (%)                  |                                |                                |                                | 0.593          |
| Nonsmokers                      | 81 (43.3)                      | 77 (41.8)                      | 92 (49.5)                      |                |
| Former smokers                  | 16 (8.6)                       | 15 (8.2)                       | 16 (8.6)                       |                |
| Current smokers                 | 90 (48.1)                      | 92 (50.0)                      | 78 (41.9)                      |                |
| Drinking, n (%)                 |                                |                                |                                | 0.678          |
| Nondrinkers                     | 121 (64.7)                     | 109 (59.2)                     | 111 (59.7)                     |                |
| Former drinkers                 | 25 (13.4)                      | 28 (15.2)                      | 33 (17.7)                      |                |
| Current drinkers                | 41 (21.9)                      | 47 (25.5)                      | 42 (22.6)                      |                |
| Medical history, n (%)          |                                |                                |                                |                |
| Hypertension                    | 125 (66.8)                     | 134 (72.8)                     | 136 (73.1)                     | 0.322          |
| Diabetes mellitus               | 40 (21.4)                      | 26 (14.1)                      | 30 (16.1)                      | 0.160          |
| Coronary heart disease          | 51 (27.3)                      | 55 (29.9)                      | 60 (32.3)                      | 0.574          |
| Atrial fibrillation             | 22 (11.8)                      | 42 (22.8)                      | 52 (28.0)                      | <0.001         |
| Dyslipidemia                    | 21 (11.2)                      | 29 (15.8)                      | 46 (24.7)                      | 0.002          |
| NIHSS, score                    | 7.0 [3.0, 13.0]                | 13.0 [8.0, 20.2]               | 17.0 [12.0, 23.8]              | <0.001         |
| Pneumonia severity index, score | 69.0 [60.0, 85.0]              | 81.0 [65.0, 102.0]             | 94.5 [77.2, 114.8]             | <0.001         |

|                                             |                   |                   |                   |        |
|---------------------------------------------|-------------------|-------------------|-------------------|--------|
| TOAST, n (%)                                |                   |                   |                   | <0.001 |
| LAA                                         | 82 (43.9)         | 67 (36.4)         | 72 (38.7)         |        |
| CES                                         | 36 (19.3)         | 64 (34.8)         | 84 (45.2)         |        |
| SVS                                         | 19 (10.2)         | 5 (2.7)           | 3 (1.6)           |        |
| SOD                                         | 36 (19.3)         | 28 (15.2)         | 22 (11.8)         |        |
| SUD                                         | 14 (7.5)          | 20 (10.9)         | 5 (2.7)           |        |
| Blood examination                           |                   |                   |                   |        |
| White blood cells, $\times 10^9/L$          | 7.0 [5.8, 8.6]    | 9.4 [7.8, 11.5]   | 11.2 [9.3, 13.8]  | <0.001 |
| Lymphocyte, $\times 10^9/L$                 | 24.0 [20.6, 28.6] | 13.9 [12.5, 15.6] | 7.6 [5.9, 9.4]    | <0.001 |
| Neutrophils, $\times 10^9/L$                | 67.2 [61.7, 71.2] | 79.0 [76.0, 81.6] | 86.3 [84.3, 89.4] | <0.001 |
| C-reactive protein, mg/L                    | 3.8 [1.8, 10.8]   | 11.0 [3.6, 31.5]  | 12.1 [3.7, 33.9]  | <0.001 |
| Platelet, $\times 10^9/L$                   | 8.1 [6.3, 10.3]   | 13.7 [10.2, 16.5] | 24.8 [17.7, 34.9] | <0.001 |
| Mean corpuscular volume, fL                 | 90.6 (5.1)        | 90.6 (5.3)        | 91.6 (6.1)        | 0.117  |
| Red cell distribution width, %              | 13.1 [12.6, 13.7] | 13.0 [12.6, 13.7] | 13.3 [12.8, 13.8] | 0.026  |
| Glucose, mmol/L                             | 5.5 [4.8, 7.3]    | 6.3 [5.4, 8.1]    | 7.0 [5.9, 8.9]    | <0.001 |
| High-density lipoprotein, mmol/L            | 1.1 (0.3)         | 1.7 (8.6)         | 1.8 (8.6)         | 0.554  |
| Low-density lipoprotein, mmol/L             | 2.6 [2.2, 3.3]    | 2.5 [1.8, 3.2]    | 2.4 [1.9, 2.9]    | 0.018  |
| Triglyceride, mmol/L                        | 1.3 [0.9, 1.8]    | 1.2 [0.9, 1.5]    | 1.0 [0.8, 1.3]    | <0.001 |
| Total cholesterol, mmol/L                   | 4.5 (1.5)         | 4.2 (1.2)         | 4.1 (1.1)         | 0.021  |
| Interleukin-6, ng/L                         | 15.4 [6.7, 49.8]  | 16.1 [8.8, 35.6]  | 23.8 [12.3, 56.4] | 0.002  |
| Albumin, g/L                                | 39.1 [36.6, 42.0] | 38.6 [34.5, 41.7] | 37.5 [33.6, 40.6] | 0.001  |
| Antibiotics, n (%)                          |                   |                   |                   | 0.051  |
| Cephalosporins, carbapenems and monobactams | 326 (58.5)        | 109 (58.3)        | 102 (55.4)        |        |
| Fluoroquinolones                            | 49 (8.8)          | 21 (11.2)         | 9 (4.9)           |        |
| Penicillins                                 | 7 (1.3)           | 1 (0.5)           | 2 (1.1)           |        |

|                                 |                |                |                |        |
|---------------------------------|----------------|----------------|----------------|--------|
| None                            | 175 (31.4)     | 56 (29.9)      | 71 (38.6)      |        |
| Medications at discharge, n (%) |                |                |                |        |
| Antiplatelet drugs              | 164 (87.7)     | 138 (75.0)     | 132 (71.0)     | 0.021  |
| Anticoagulants                  | 24 (12.8)      | 34 (18.5)      | 43 (23.1)      | 0.036  |
| Mortality, n (%)                | 18 (9.6)       | 51 (27.7)      | 80 (43.0)      | <0.001 |
| Follow-up time, years           | 3.6 [2.1, 5.1] | 2.8 [1.1, 4.3] | 2.2 [0.7, 3.7] | <0.001 |
| Stroke recurrence, n (%)        | 29 (15.5)      | 26 (14.1)      | 25 (13.4)      | 0.845  |

Abbreviations: BMI, body mass index; CAR, C-reactive protein-albumin ratio; CES, cardio-embolism; IIC, cumulative inflammatory index; LAA, large-artery atherosclerosis; NIHSS, National Institute of Health Stroke Scale; NLR, neutrophil-lymphocyte ratio; PLR, platelet-lymphocyte ratio; SOE, stroke of other determined etiology; SUE, stroke of undetermined etiology; SVS, small-vessel occlusion; TOAST, Trial of ORG 10172 in Acute Stroke Treatment.

**Table S3. Univariable Analyses for the Predictors of the Long-Term Mortality in Stroke-Associated Pneumonia.**

| <b>Characteristics</b>                 | <b>HR (95% CI)</b> | <b>P value</b> |
|----------------------------------------|--------------------|----------------|
| Age, years                             | 1.06 (1.04-1.08)   | <0.001         |
| Male, n (%)                            | 0.88 (0.63-1.24)   | 0.464          |
| BMI, kg/m <sup>2</sup>                 | 1.00 (0.95-1.04)   | 0.838          |
| Vital signs                            |                    |                |
| Systolic blood pressure, mmHg          | 1.00 (0.99-1.01)   | 0.530          |
| Temperature, °C                        | 1.61 (1.35-1.92)   | <0.001         |
| Pulse, n/min                           | 1.01 (1.01-1.02)   | <0.001         |
| Smoking, n (%)                         |                    |                |
| Nonsmokers                             | Reference          |                |
| Former smokers                         | 1.10 (0.62-1.94)   | 0.753          |
| Current smokers                        | 0.79 (0.57-1.11)   | 0.182          |
| Drinking, n (%)                        |                    |                |
| Nondrinkers                            | Reference          |                |
| Former drinkers                        | 0.87 (0.55-1.38)   | 0.545          |
| Current drinkers                       | 0.82 (0.53-1.25)   | 0.349          |
| Medical history, n (%)                 |                    |                |
| Hypertension                           | 1.45 (0.99-2.11)   | 0.056          |
| Diabetes mellitus                      | 0.98 (0.65-1.49)   | 0.942          |
| Coronary heart disease                 | 0.97 (0.67-1.40)   | 0.876          |
| Atrial fibrillation                    | 2.44 (1.75-3.41)   | <0.001         |
| Dyslipidemia                           | 1.38 (0.92-2.07)   | 0.119          |
| NIHSS, score                           | 1.05 (1.04-1.07)   | <0.001         |
| Pneumonia severity index, score        | 1.02 (1.02-1.03)   | <0.001         |
| TOAST, n (%)                           |                    |                |
| LAA                                    | Reference          |                |
| CES                                    | 1.85 (1.30-2.65)   | <0.001         |
| SVS                                    | 0.73 (0.29-1.83)   | 0.502          |
| SOD                                    | 0.73 (0.42-1.28)   | 0.278          |
| SUD                                    | 0.62 (0.25-1.56)   | 0.309          |
| Blood examination                      |                    |                |
| White blood cells, ×10 <sup>9</sup> /L | 1.03 (1.00-1.06)   | 0.033          |
| Lymphocyte, ×10 <sup>9</sup> /L        | 0.91 (0.89-0.93)   | <0.001         |
| Neutrophils, ×10 <sup>9</sup> /L       | 1.08 (1.06-1.10)   | <0.001         |
| C-reactive protein, mg/L               | 1.01 (1.00-1.01)   | <0.001         |
| Platelet, ×10 <sup>9</sup> /L          | 1.00 (1.00-1.00)   | 0.550          |
| Mean corpuscular volume, fL            | 1.03 (0.99-1.06)   | 0.105          |
| Red cell distribution width, %         | 1.22 (1.07-1.39)   | 0.003          |
| Glucose, mmol/L                        | 1.01 (0.99-1.02)   | 0.257          |
| High-density lipoprotein, mmol/L       | 1.01 (0.99-1.03)   | 0.218          |
| Low-density lipoprotein, mmol/L        | 0.85 (0.72-1.01)   | 0.072          |
| Triglyceride, mmol/L                   | 0.86 (0.67-1.10)   | 0.226          |

|                                             |                  |        |
|---------------------------------------------|------------------|--------|
| Total cholesterol, mmol/L                   | 0.90 (0.78-1.04) | 0.144  |
| Interleukin-6, ng/L                         | 1.00 (1.00-1.00) | 0.051  |
| Albumin, g/L                                | 0.94 (0.92-0.97) | <0.001 |
| Antibiotics, n (%)                          |                  |        |
| Cephalosporins, carbapenems and monobactams | Reference        |        |
| Fluoroquinolones                            | 0.65 (0.33-1.30) | 0.221  |
| Penicillins                                 | 2.19 (0.69-6.94) | 0.183  |
| None                                        | 1.35 (0.96-1.90) | 0.084  |
| Medications at discharge, n (%)             |                  |        |
| Antiplatelet drugs                          | 0.52 (0.37-0.74) | <0.001 |
| Anticoagulants                              | 1.09 (0.73-1.65) | 0.667  |
| Inflammatory markers                        |                  |        |
| NLR                                         | 1.07 (1.05-1.10) | <0.001 |
| PLR                                         | 1.00 (1.00-1.00) | 0.550  |
| CAR                                         | 1.26 (1.11-1.43) | <0.001 |
| IIC at discharge                            | 1.07 (1.04-1.09) | <0.001 |

Abbreviations: BMI, body mass index; CAR, C-reactive protein-albumin ratio; CES, cardio-embolism; CI, confidence interval; HR, hazard ratio; LAA, large-artery atherosclerosis; NIHSS, National Institute of Health Stroke Scale; NLR, neutrophil-lymphocyte ratio; PLR, platelet-lymphocyte ratio; SOE, stroke of other determined etiology; SUE, stroke of undetermined etiology; SVS, small-vessel occlusion; TOAST, Trial of ORG 10172 in Acute Stroke Treatment.

**Table S4. The dynamic relationship between IIC and long-term mortality risk.**

| IIC                      | Model 1          |                | Model 2          |                | Model 3          |                |
|--------------------------|------------------|----------------|------------------|----------------|------------------|----------------|
|                          | HR (95% CI)      | <i>P</i> value | HR (95% CI)      | <i>P</i> value | HR (95% CI)      | <i>P</i> value |
| Trajectory: High to High | Reference        |                | Reference        |                | Reference        |                |
| Trajectory: High to Low  | 0.55 (0.33-0.92) | 0.023          | 0.50 (0.29-0.84) | 0.010          | 0.46 (0.26-0.78) | 0.005          |
| Trajectory: Low to High  | 0.46 (0.27-0.79) | 0.005          | 0.54 (0.30-0.97) | 0.040          | 0.62 (0.35-1.09) | 0.097          |
| Trajectory: Low to Low   | 0.16 (0.09-0.30) | <0.001         | 0.21 (0.11-0.42) | <0.001         | 0.29 (0.15-0.56) | <0.001         |

Abbreviations: BMI, body mass index; CI, confidence interval; HR, hazard ratio; IIC, cumulative inflammatory index; NIHSS, National Institute of Health Stroke Scale; TOAST, Trial of ORG 10172 in Acute Stroke Treatment.

To capture the dynamic changes in IIC, patients were stratified into high or low groups at both admission and discharge according to the median IIC value at each time point. By combining the admission and discharge classifications, four distinct trajectories were defined: (1) Low to Low, patients who remained in the low group throughout hospitalization; (2) Low to High, patients who shifted from the low group at admission to the high group at discharge; (3) High to Low, patients who shifted from the high group at admission to the low group at discharge; and (4) High to High, patients who consistently remained in the high group at both time points.

Model 1 was unadjusted model.

Model 2 was adjusted for demographic variables, medical history and inflammatory markers including: age, sex, BMI, NIHSS, TOAST, hypertension, diabetes mellitus, atrial fibrillation, white blood cells, C-reactive protein, glucose, and interleukin-6.

Model 3 was adjusted for variables with  $P < 0.1$  in the univariable analysis and back-ward selection method. The variables included in the final model were age, temperature, NIHSS, hypertension, atrial fibrillation, albumin, antibiotics and pneumonia severity index.
